# Supplementary material for: Screening for insulin-independent pathways that modulate glucose homeostasis identifies androgen receptor antagonists
Source: eLife journal article supplement (doi:10.7554/elife.42209), 2018-12-06
Supplement: supp [file elife-42209-supp-v1.zip]

**Figure 2 - figure supplement 1**

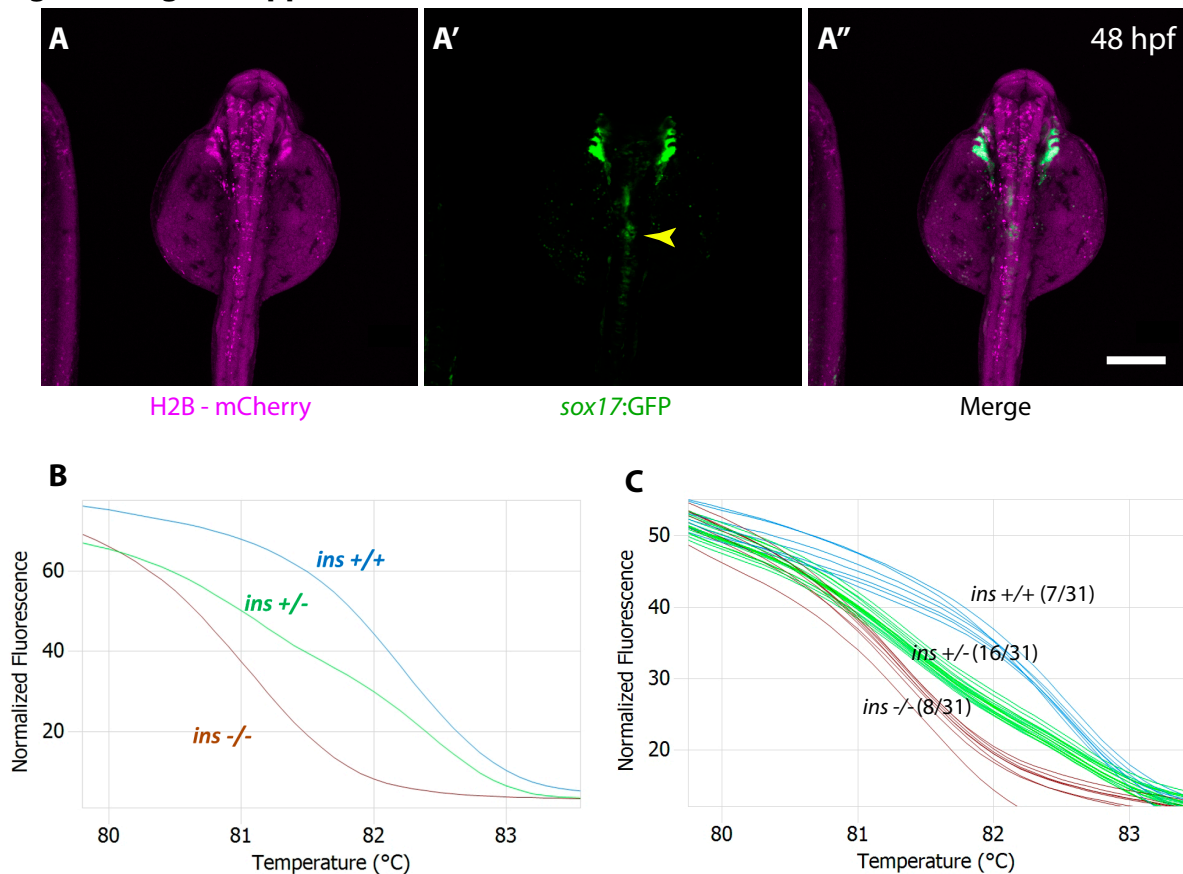

| Genotype     | Melting Temp | Melting Temp II |
|--------------|--------------|-----------------|
| Wild-type    | 82.2         |                 |
| Heterozygous | 82.1         | 76.5            |
| Mutant       | 81.1         |                 |
