# Supplementary figures and images for: Screening for insulin-independent pathways that modulate glucose homeostasis identifies androgen receptor antagonists
Source: eLife journal article supplement (doi:10.7554/elife.42209), 2018-12-06

Figure 4 - figure supplement 1

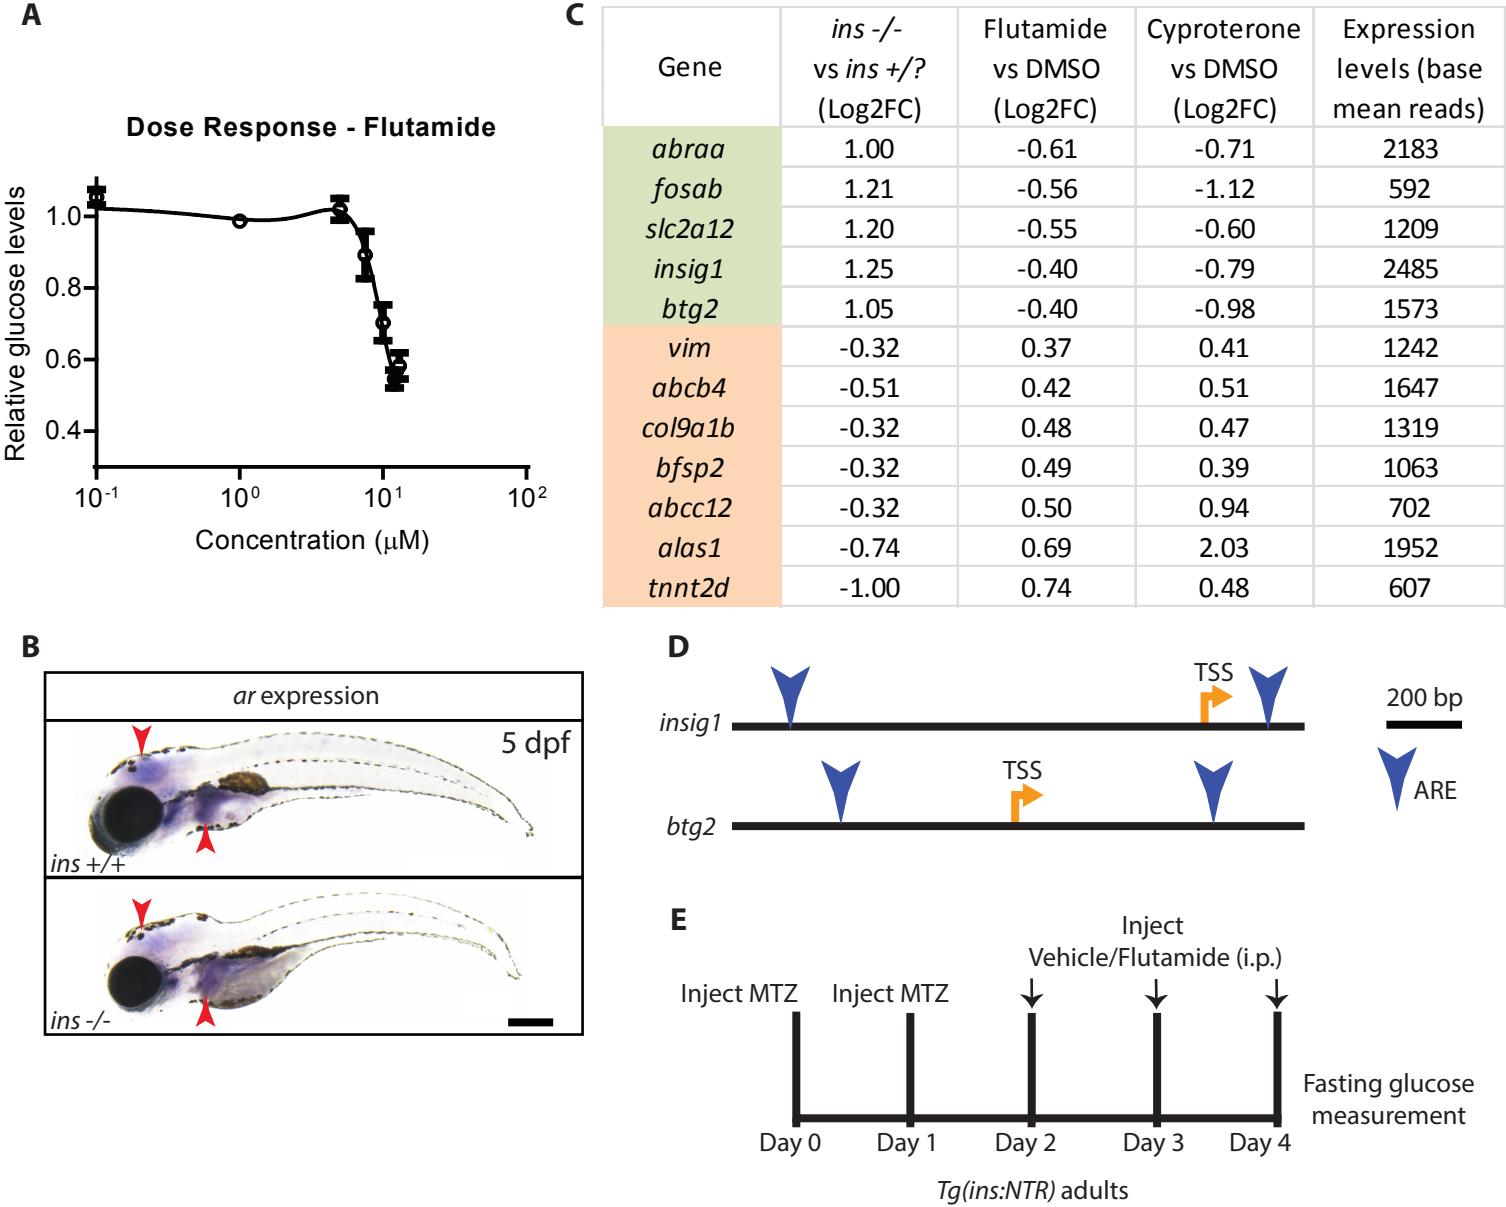

Supplement: supp [file elife-42209-supp-v1.zip]

**Figure 3 - figure supplement 1**

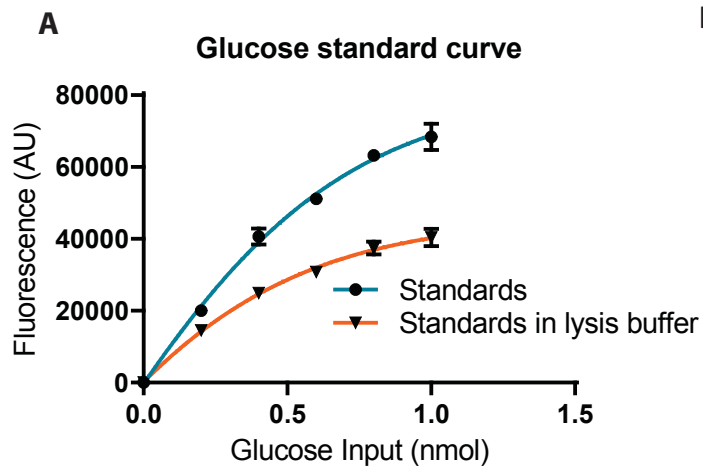

**B**

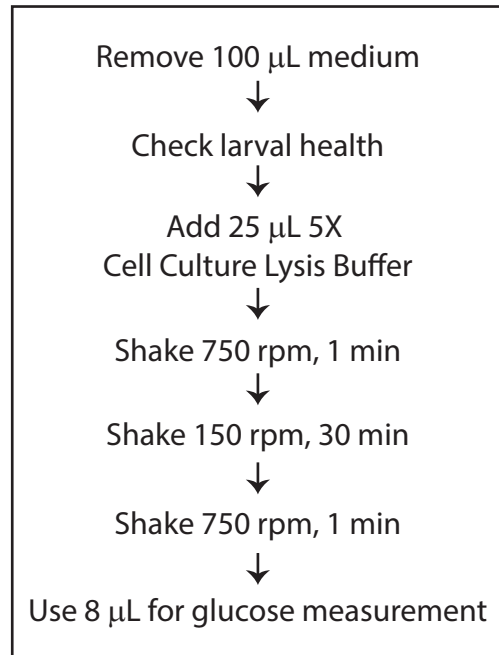

**C**

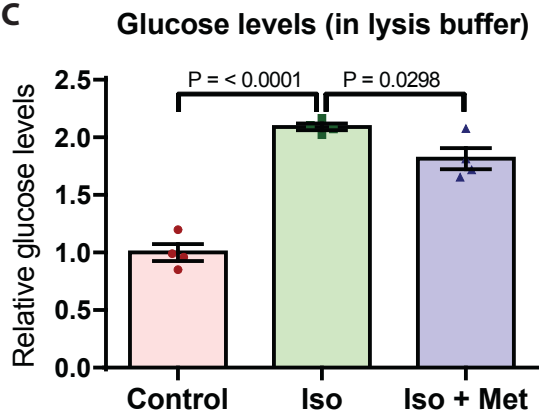

**D**

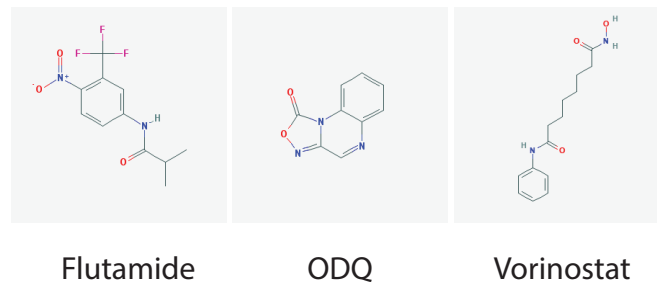

Supplement: supp [file elife-42209-supp-v1.zip]

**Figure 1 - figure supplement 1**

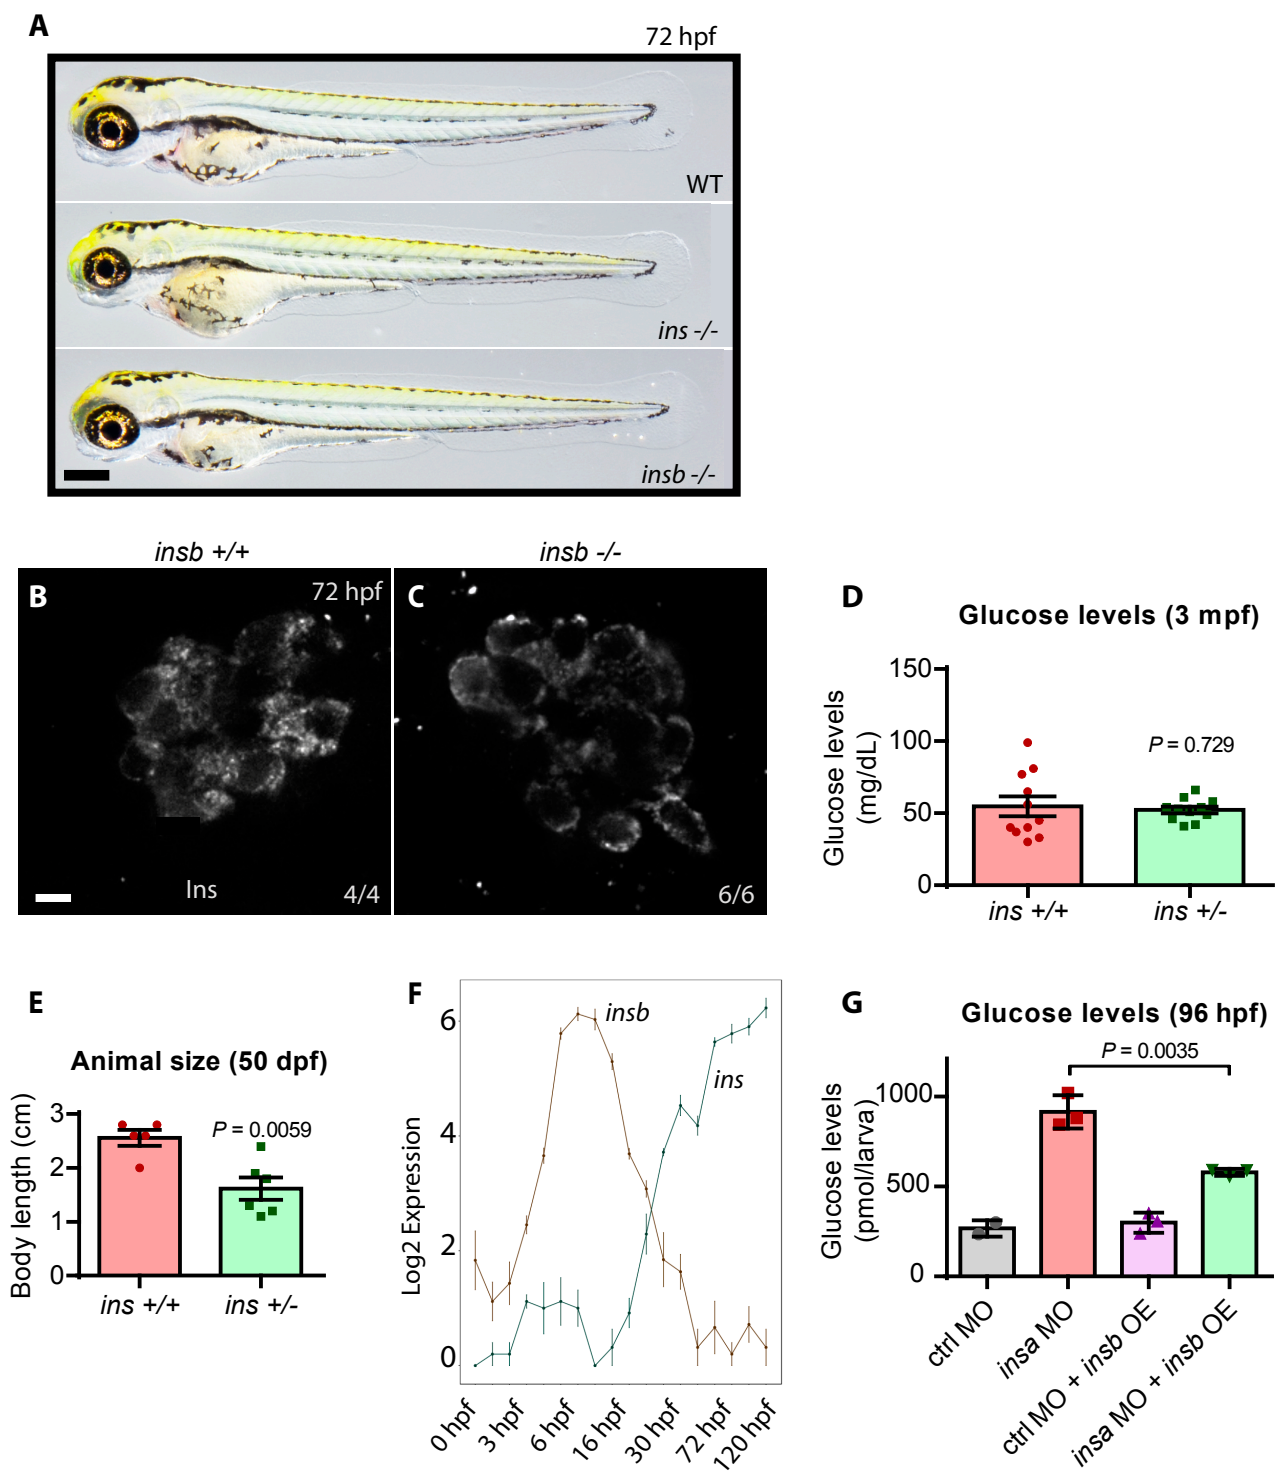

Supplement: supp [file elife-42209-supp-v1.zip]
